# Supplementary material for: Defining consensus leukemia-associated immunophenotypes for detection of minimal residual disease in acute myeloid leukemia in a multicenter setting
Source: PubMed Central journal article supplement — Blood Cancer J. 2013 Aug 2;3(8):e129–. doi: 10.1038/bcj.2013.27 (PMC3763381; doi:10.1038/bcj.2013.27), 2013-08-02
Supplement: bcj201327x3.pdf [file bcj201327x3.pdf]

**Supplementary table 1: Comparison of antigen expression levels at diagnosis and relapse**

|    |   | CD34 | CD117 | CD133 | CD2 | CD5 | CD7 | CD11b | CD11c | CD13 | CD15 | CD19 | CD22 | CD33 | CD38 | CD56 | CD61 | CD65 | HLADR |
|----|---|------|-------|-------|-----|-----|-----|-------|-------|------|------|------|------|------|------|------|------|------|-------|
| 1  | D | 28   |       |       | 87  |     |     |       |       | 87   |      |      |      |      |      |      |      |      |       |
|    | R | 16   |       |       | 90  |     |     |       |       | 90   |      |      |      |      |      |      |      |      |       |
| 2  | D | 32   | 80    |       | 38  |     |     |       |       |      |      |      |      |      |      |      |      |      |       |
|    | R | 17   | 91    |       | 29  |     |     |       |       |      |      |      |      |      |      |      |      |      |       |
| 3  | D | 10   |       |       |     |     | 56  |       |       | 56   |      |      |      | 61   |      |      |      |      |       |
|    | R | 8    |       |       |     |     | 83  |       |       | 83   |      |      |      | 89   |      |      |      |      |       |
| 4  | D | 64   |       |       | 99  |     | 53  |       |       | 99   |      |      |      |      |      |      |      |      |       |
|    | R | 51   |       |       | 91  |     | 65  |       |       | 100  |      |      |      |      |      |      |      |      |       |
| 5  | D |      | 60    |       |     |     |     |       |       |      |      |      |      | 35   |      |      |      |      | 38    |
|    | R |      | 20    |       |     |     |     |       |       |      |      |      |      | 36   |      |      |      |      | 36    |
| 6  | D | 87   |       |       | 62  |     |     |       |       | 90   |      |      |      |      |      |      |      |      |       |
|    | R | 52   |       |       | 14  |     |     |       |       | 85   |      |      |      |      |      |      |      |      |       |
| 7  | D | 13   | 90    |       |     |     | 18  |       |       | 90   |      |      |      |      |      |      |      |      |       |
|    | R | 8    | 89    |       |     |     | 20  |       |       | 92   |      |      |      |      |      |      |      |      |       |
| 8  | D | 15   |       |       | 95  |     |     |       |       |      |      |      |      |      |      |      |      |      |       |
|    | R | 46   |       |       | 86  |     |     |       |       |      |      |      |      |      |      |      |      |      |       |
| 9  | D |      | 18    |       |     |     | 43  |       |       |      |      |      |      |      |      |      |      |      |       |
|    | R |      | 19    |       |     |     | 3   |       |       |      |      |      |      |      |      |      |      |      |       |
| 10 | D | 13   |       |       |     |     | 21  |       |       | 89   |      |      |      |      |      |      |      |      |       |
|    | R | 35   |       |       |     |     | 17  |       |       | 90   |      |      |      |      |      |      |      |      |       |
| 11 | D | 31   |       |       |     |     |     |       |       | 70   |      |      |      |      |      |      |      |      |       |
|    | R | 50   |       |       |     |     |     |       |       | 75   |      |      |      |      |      |      |      |      |       |
| 12 | D | 96   |       |       |     |     |     |       |       |      |      |      |      | 25   |      |      |      |      | 56    |
|    | R | 85   |       |       |     |     |     |       |       |      |      |      |      | 91   |      |      |      |      | 36    |
| 13 | D | 76   | 84    |       |     | 64  | 96  |       |       | 96   |      |      |      |      |      |      |      |      |       |
|    | R | 83   | 66    |       |     | 59  | 94  |       |       | 94   |      |      |      |      |      |      |      |      |       |
| 14 | D | 54   | 88    |       | 89  |     |     |       |       | 89   |      |      |      |      |      |      |      |      |       |
|    | R | 64   | 93    |       | 80  |     |     |       |       | 80   |      |      |      |      |      |      |      |      |       |
| 15 | D | 1    | 69    | 52    |     |     |     |       |       | 71   |      | 42   |      | 100  |      |      | 54   |      |       |
|    | R | 74   | 71    | 38    |     |     |     |       |       | 95   |      | 1    |      | 100  |      |      | 14   |      |       |
| 16 | D | 6    | 52    | 40    |     |     | 30  |       |       |      |      |      |      |      | 94   |      |      |      |       |
|    | R | 5    | 55    | 46    |     |     | 30  |       |       |      |      |      |      |      | 80   |      |      |      |       |
| 17 | D | 33   |       |       |     |     | 51  |       |       | 93   |      | 84   |      |      |      | 97   |      |      |       |
|    | R | 45   |       |       |     |     | 35  |       |       | 83   |      | 85   |      |      |      | 87   |      |      |       |
| 18 | D |      |       |       |     |     |     |       |       |      |      |      |      | 52   |      | 52   |      |      | 66    |
|    | R |      |       |       |     |     |     |       |       |      |      |      |      | 38   |      | 38   |      |      | 40    |
| 19 | D |      | 79    |       |     |     |     |       | 96    |      | 96   |      |      | 99   |      | 99   |      | 88   |       |
|    | R |      | 67    |       |     |     |     |       | 88    |      | 87   |      |      | 99   |      | 74   |      | 87   |       |
| 20 | D | 82   | 72    |       |     |     | 73  |       |       |      |      | 72   |      |      |      |      |      |      |       |
|    | R | 24   | 98    |       |     |     | 80  |       |       |      |      | 81   |      |      |      |      |      |      |       |
| 21 | D | 3    |       | 44    |     |     |     |       |       |      |      |      |      |      |      |      |      |      |       |
|    | R | 72   |       | 1     |     |     |     |       |       |      |      |      |      |      |      |      |      |      |       |
| 22 | D | 5    |       |       |     |     | 86  |       |       |      |      |      |      |      |      |      |      |      |       |
|    | R | 5    |       |       |     |     | 76  |       |       |      |      |      |      |      |      |      |      |      |       |
| 23 | D | 23   | 85    |       | 14  |     | 75  | 75    |       |      |      |      |      |      |      |      |      |      |       |
|    | R | 22   | 97    |       | 3   |     | 76  | 73    |       |      |      |      |      |      |      |      |      |      |       |
| 24 | D | 31   | 92    |       | 92  |     |     |       |       | 92   |      |      |      |      |      |      |      |      |       |
|    | R | 31   | 93    |       | 93  |     |     |       |       | 71   |      |      |      |      |      |      |      |      |       |
| 25 | D | 5    | 32    | 92    |     |     |     |       | 97    |      | 98   | 96   |      | 92   |      | 72   |      | 97   |       |
|    | R | 4    | 40    | 52    |     |     |     |       | 80    |      | 79   | 0    |      | 77   |      | 77   |      | 96   |       |

|    |   |           |           |    |    |  |  |  |    |           |    |
|----|---|-----------|-----------|----|----|--|--|--|----|-----------|----|
| 26 | D | 84        | <b>41</b> |    | 43 |  |  |  |    | 98        | 98 |
|    | R | 84        | <b>4</b>  |    | 43 |  |  |  |    | 80        | 80 |
| 27 | D | <b>14</b> | 41        | 40 | 32 |  |  |  | 47 | 92        |    |
|    | R | <b>67</b> | 41        | 39 | 77 |  |  |  | 31 | 90        |    |
| 28 | D | 72        | 79        |    |    |  |  |  |    | 95        |    |
|    | R | 80        | 84        |    |    |  |  |  |    | 98        |    |
| 29 | D |           |           |    |    |  |  |  |    | 96        | 96 |
|    | R |           |           |    |    |  |  |  |    | 98        | 98 |
| 30 | D | 39        | 50        |    |    |  |  |  |    |           |    |
|    | R | 42        | 75        |    |    |  |  |  |    |           |    |
| 31 | D | 86        |           |    |    |  |  |  | 92 | <b>67</b> | 72 |
|    | R | 94        |           |    |    |  |  |  | 87 | <b>14</b> | 78 |
| 32 | D | <b>2</b>  | 43        | 6  |    |  |  |  |    |           |    |
|    | R | <b>38</b> | 45        | 0  |    |  |  |  |    |           |    |
| 33 | D | 79        |           |    | 23 |  |  |  |    | 100       |    |
|    | R | 69        |           |    | 23 |  |  |  |    | 100       |    |

D, diagnosis; R, Relapse

Figures denote percentages expression of the markers. A relevant change in antigen expression was defined as a switch from negative (<20%) to positive (≥20%) or vice versa. Antigen changes are marked in red
