# Supplementary material for: Defining consensus leukemia-associated immunophenotypes for detection of minimal residual disease in acute myeloid leukemia in a multicenter setting
Source: PubMed Central journal article supplement — Blood Cancer J. 2013 Aug 2;3(8):e129–. doi: 10.1038/bcj.2013.27 (PMC3763381; doi:10.1038/bcj.2013.27), 2013-08-02
Supplement: bcj201327x4.pdf [file bcj201327x4.pdf]

## Supplementary Table 2: Performance of LAP design for the different types of aberrancies

| LAP                              | Phase | Institute 1 |           | Institute 2 |            | Institute 3 |           | Institute 4 |            | Institute 5 |           |
|----------------------------------|-------|-------------|-----------|-------------|------------|-------------|-----------|-------------|------------|-------------|-----------|
|                                  |       | Missed      | %         | Missed      | %          | Missed      | %         | Missed      | %          | Missed      | %         |
| Cross-lineage antigen expression | 1     | 1/14        | 7.1       | 1/11        | 9.1        | 1/14        | 7.1       | 3/13        | 23         | 2/8         | 25        |
|                                  | 2     | 0/28        | <b>0</b>  | 2/28        | <b>7.1</b> | 8/28        | <b>29</b> | 2/27        | <b>7.4</b> | 7/22        | <b>32</b> |
| Asynchronous antigen expression  | 1     | 1/32        | 3.1       | 16/28       | 57         | 20/32       | 63        | 21/31       | 68         | 11/19       | 58        |
|                                  | 2     | 0/42        | <b>0</b>  | 20/42       | <b>48</b>  | 14/42       | <b>33</b> | 18/40       | <b>45</b>  | 10/32       | <b>31</b> |
| Antigen over-expression          | 1     | 0/1         | 0         | 0/0         |            | 1/1         | 100       | 1/1         | 100        | 0/1         | 0         |
|                                  | 2     | 2/8         | <b>25</b> | 2/8         | <b>25</b>  | 6/8         | <b>75</b> | 7/8         | <b>88</b>  | 3/4         | <b>75</b> |
| LAPs without immature markers    | 1     | 1/8         | 2.5       | 0/7         | 0          | 5/8         | 63        | 5/8         | 63         | 2/2         | 100       |
|                                  | 2     | 0/10        | <b>0</b>  | 2/10        | <b>20</b>  | 4/10        | <b>40</b> | 4/8         | <b>50</b>  | 1/7         | <b>14</b> |

Shown are the percentages of missed LAPS in the two phases of the study (phase 1: learning phase; phase 2: test phase). In bold are the percentages in the most important part of the study: the test phase. In most cases there is an improvement from phase 1 to phase 2.

Improvements were significant for asynchronous expression:  $p=0.025$  (all centers) and  $p=0.017$  for centers 2-5.
