# Supplementary material for: Defining consensus leukemia-associated immunophenotypes for detection of minimal residual disease in acute myeloid leukemia in a multicenter setting
Source: PubMed Central journal article supplement — Blood Cancer J. 2013 Aug 2;3(8):e129–. doi: 10.1038/bcj.2013.27 (PMC3763381; doi:10.1038/bcj.2013.27), 2013-08-02
Supplement: bcj201327x5.pdf [file bcj201327x5.pdf]

**Supplementary table 3 : Percentage of missed LAPs per institute, categorized according to sub-type and study phase**

| LAP*                                       | Phase# | Institute 1 |         | Institute 2 |         | Institute 3 |         | Institute 4 |         | Institute 5 |         |
|--------------------------------------------|--------|-------------|---------|-------------|---------|-------------|---------|-------------|---------|-------------|---------|
|                                            |        | Missed      | (%)     |
| Cross-lineage expression<br>CD7            | 1      | 1/11        | (9.1%)  | 0/9         | (0%)    | 0/11        | (0%)    | 1/10        | (10%)   | 2/6         | (33.3%) |
|                                            | 2      | 0/15        | (0%)    | 0/15        | (0%)    | 3/15        | (20%)   | 0/14        | (0%)    | 4/12        | (33.3%) |
| CD22                                       | 1      |             |         |             |         |             |         |             |         |             |         |
|                                            | 2      | 0/6         | (0%)    | 1/6         | (16.7%) | 3/6         | (50%)   | 1/6         | (16.7%) | 1/5         | (20%)   |
| CD56                                       | 1      | 0/1         | (0%)    | 1/1         | (100%)  | 1/1         | (100%)  | 1/1         | (100%)  | 0/1         | (0%)    |
|                                            | 2      | 0/4         | (0%)    | 0/4         | (0%)    | 1/4         | (25%)   | 1/4         | (25%)   | 1/3         | (33.3%) |
| Asynchronous expression<br>CD15            | 1      | 0/9         | (0%)    | 5/7         | (71.4%) | 4/9         | (44.4%) | 7/9         | (77.8%) | 4/5         | (80%)   |
|                                            | 2      | 0/10        | (0%)    | 8/10        | (80%)   | 3/10        | (30%)   | 5/10        | (50%)   | 2/7         | (28.6%) |
| CD36                                       | 1      | n.e.        |         |
|                                            | 2      | 0/6         | (0%)    | 1/6         | (16.7%) | 4/6         | (66.7%) | 5/6         | (83.3%) | 4/6         | (66.7%) |
| CD11b                                      | 1      | 0/3         | (0%)    | 2/2         | (100%)  | 3/3         | (100%)  | 2/2         | (100%)  | 3/3         | (100%)  |
|                                            | 2      | 0/2         | (0%)    | 1/2         | (50%)   | 2/2         | (100%)  | 2/2         | (100%)  | 1/2         | (50%)   |
| CD13neg                                    | 1      | 1/4         | (0%)    | 3/4         | (75%)   | 4/4         | (100%)  | 4/4         | (100%)  | 2/2         | (100%)  |
|                                            | 2      | 0/5         | (0%)    | 1/5         | (20%)   | 2/5         | (40%)   | 2/5         | (40%)   | 2/5         | (40%)   |
| CD133+CD34neg                              | 1      | 1/6         | (16.7%) | 3/6         | (50%)   | 3/6         | (50%)   | 3/6         | (50%)   | 2/5         | (40%)   |
|                                            | 2      | 0/8         | (0%)    | 4/8         | (50%)   | 1/8         | (12.5%) | 3/6         | (50%)   | 0/5         | (0%)    |
| CD15negHLADRneg                            | 1      |             |         |             |         |             |         |             |         |             |         |
|                                            | 2      | 0/4         | (0%)    | 3/4         | (75%)   | 1/4         | (25%)   | 1/4         | (25%)   | 0/2         | (0%)    |
| CD33neg                                    | 1      | 0/3         | (0%)    | 1/2         | (50%)   | 3/3         | (100%)  | 2/3         | (66.7%) |             |         |
|                                            | 2      | 0/4         | (0%)    | 2/4         | (50%)   | 0/4         | (0%)    | 0/4         | (0%)    | 0/3         | (0%)    |
| HLADRneg                                   | 1      | 0/5         | (0%)    | 1/5         | (20%)   | 1/5         | (20%)   | 3/5         | (60%)   | 0/2         | (0%)    |
|                                            | 2      | 0/3         | (0%)    | 0/3         | (0%)    | 1/3         | (33.3%) | 0/3         | (0%)    | 0/2         | (0%)    |
| Antigen overexpression<br>HLADR++          | 1      | 0/1         | (0%)    |             |         | 1/1         | (100%)  | 1/1         | (100%)  | 0/1         | (0%)    |
|                                            | 2      | 0/3         | (0%)    | 2/3         | (66.7%) | 2/3         | (66.7%) | 2/3         | (66.7%) | 2/2         | (100%)  |
| CD13++                                     | 1      |             |         |             |         |             |         |             |         |             |         |
|                                            | 2      | 2/4         | (50%)   | 0/4         | (0%)    | 3/4         | (75%)   | 4/4         | (100%)  | 1/1         | (100%)  |
| LAP without immature<br>markers<br>CD13neg | 1      | 1/5         | (20%)   | 0/4         | (0%)    | 3/5         | (60%)   | 5/5         | (100%)  | 1/1         | (100%)  |
|                                            | 2      | 0/2         | (0%)    | 0/2         | (0%)    | 1/2         | (50%)   | 2/2         | (100%)  | 1/2         | (50%)   |

\* All LAPs except "LAP without immature markers" contained a primitive marker  
# Phase1: learning phase; phase 2: test phase
