# Supplementary figures and images for: Defining consensus leukemia-associated immunophenotypes for detection of minimal residual disease in acute myeloid leukemia in a multicenter setting
Source: PubMed Central journal article supplement — Blood Cancer J. 2013 Aug 2;3(8):e129–. doi: 10.1038/bcj.2013.27 (PMC3763381; doi:10.1038/bcj.2013.27), 2013-08-02

# Supplementary Figure 1

AML at diagnosis

MRD conditions

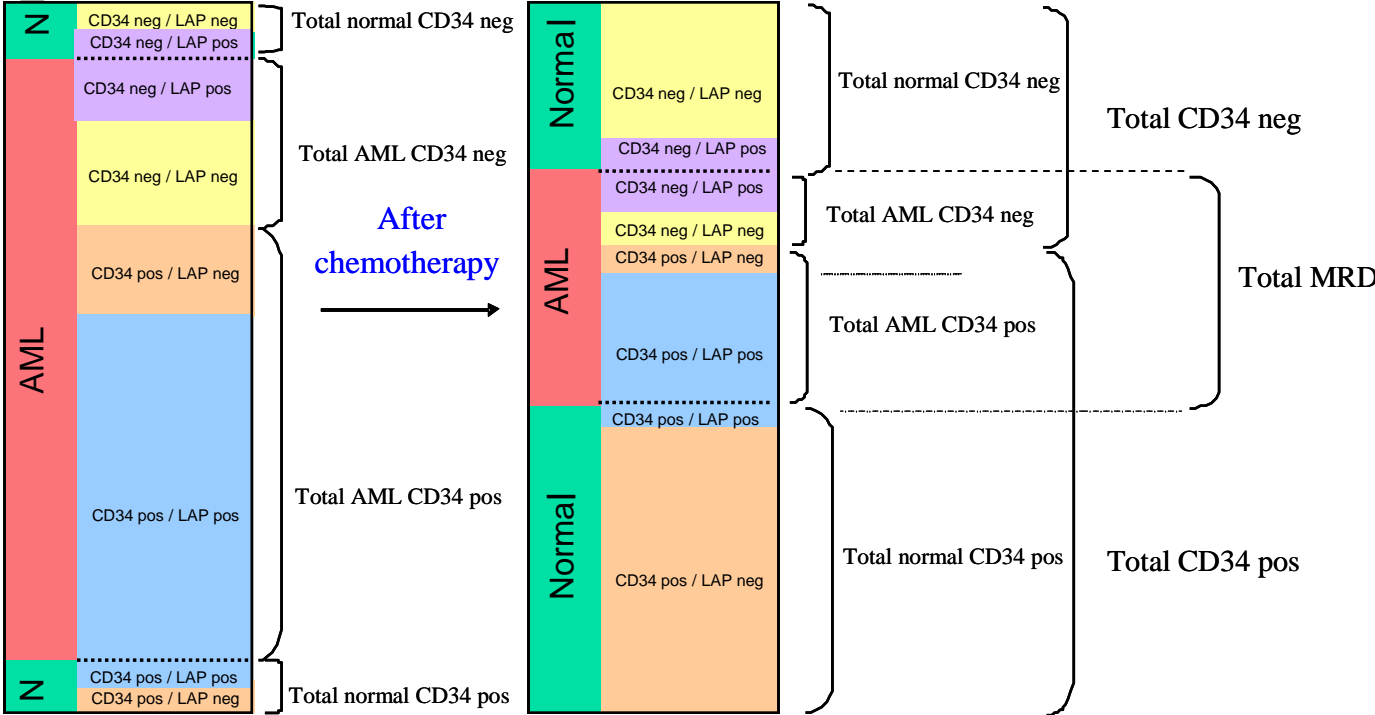

Supplement: bcj201327x1.pdf [file bcj201327x1.pdf]

# Supplementary Figure 2

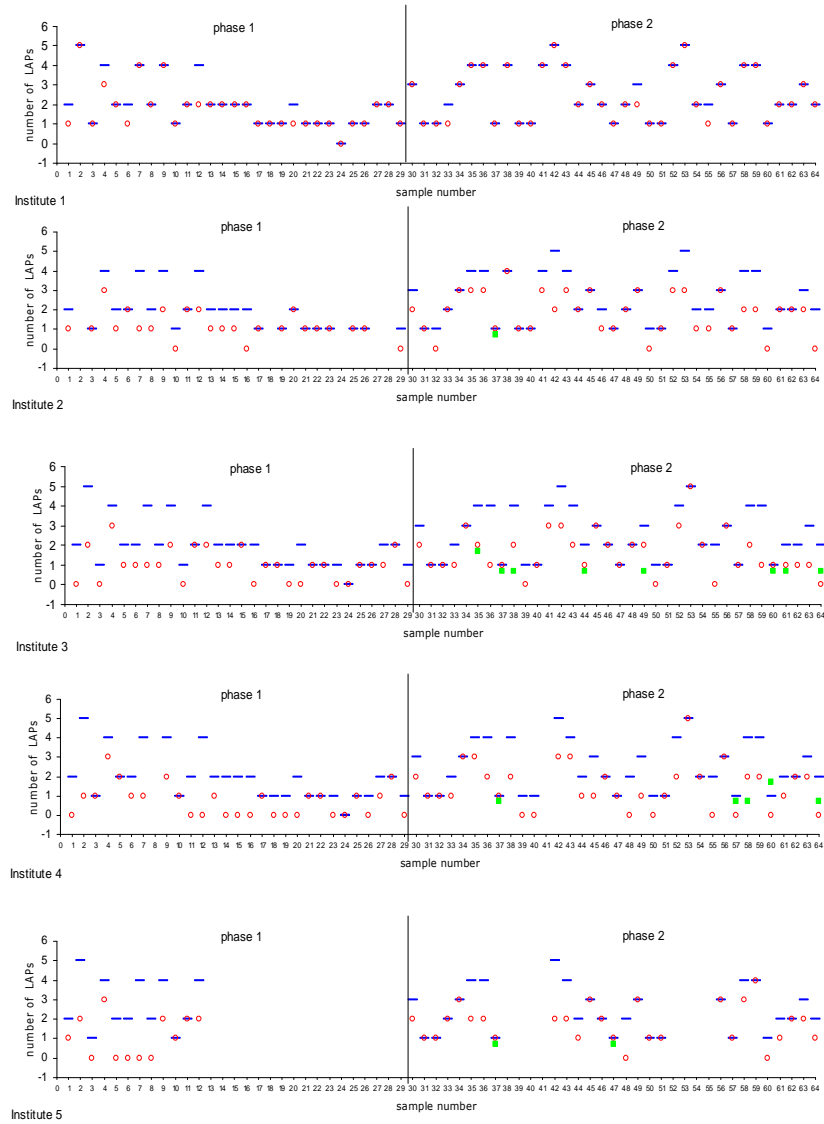

Supplement: bcj201327x2.pdf [file bcj201327x2.pdf]
